# Supplementary material
Source: PubMed Central journal article supplement (PMC11105458)
Supplement: 18_2018_2998_MOESM1_ESM.pdf [file 18_2018_2998_MOESM1_ESM.pdf]

## Suppl. Figure 1

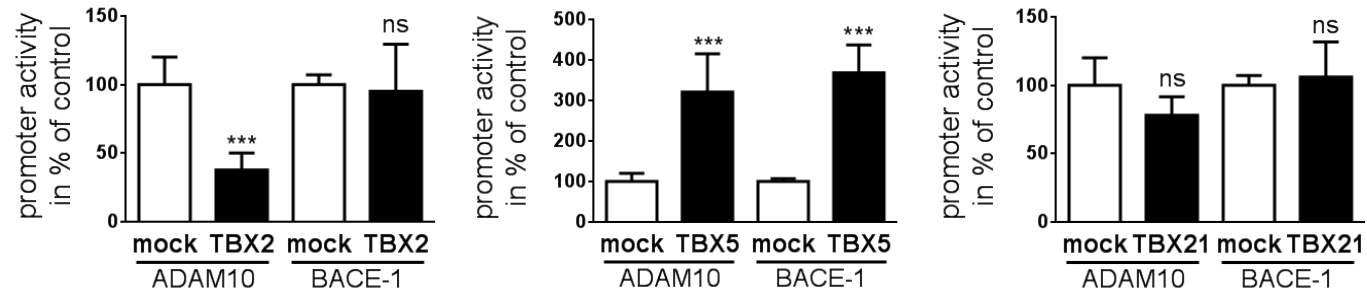

### Suppl. Figure 1: Effect of TBX family members on ADAM10 and BACE-1 promoter activity

Data have been extracted from the transcription factor screening approach described in [32]. (Unpaired Student's t-Test, ns,  $p > 0.05$ ; \*\*\*,  $p > 0.001$ ).
