# Supplementary material
Source: PubMed Central journal article supplement (PMC11105458)
Supplement: 18_2018_2998_MOESM2_ESM.pdf [file 18_2018_2998_MOESM2_ESM.pdf]

## Suppl. Figure 2

A

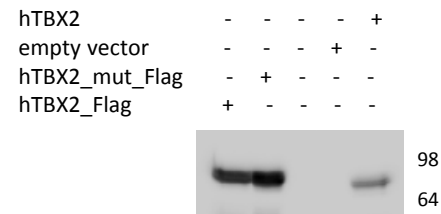

B

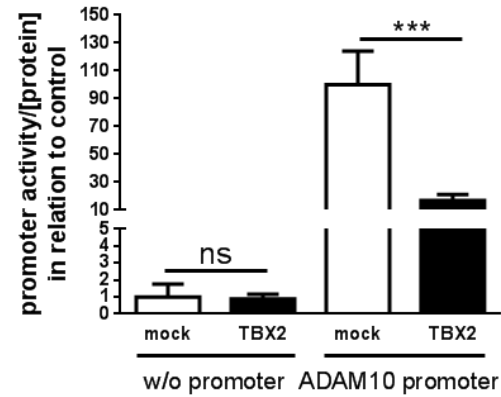

### Suppl. Figure 2: Overexpression of different TBX2 variants for usage in EMSAs

HEK293 cells were transfected as described for SH-SY5Y cells in the Material and Methods section. 20  $\mu$ g of protein were subjected to western blotting and TBX2 detected by using an appropriate antibody. To confirm functionality of TBX2 proteins in HEK293 cells with transient overexpression, human TBX2 (hTBX2) expression plasmid was cotransfected with the reporter vector for human ADAM10 promoter activity and luciferase activity assessed in the lysate (Unpaired Student's t-Test, \*\*\*,  $p > 0.001$ ).
