# Supplementary material
Source: PubMed Central journal article supplement (PMC11105458)
Supplement: 18_2018_2998_MOESM4_ESM.pdf [file 18_2018_2998_MOESM4_ESM.pdf]

## Suppl. Table 1

### A

| Parameter         | control     | AD           | <i>p</i> |
|-------------------|-------------|--------------|----------|
| Age [yr]          | 77 ± 8.27   | 78 ± 6.90    | 0.68     |
| PM delay [h]      | 25.2 ± 8.05 | 27.5 ± 14.62 | 0.58     |
| Male:female ratio | 0.75        | 0.76         | ---      |
| Braak stage       |             |              |          |
| 0-II              | 10          | 0            | ---      |
| III-IV            | 4           | 2            | ---      |
| V-VI              | 0           | 28           | ---      |

Characterization of cortical brain tissue

### B

| Parameter | ADAM10 mRNA |       |          | ADAM17 mRNA |       |          |
|-----------|-------------|-------|----------|-------------|-------|----------|
|           | Mean %      | SD    | <i>p</i> | Mean %      | SD    | <i>p</i> |
| Control   | 100         | 48.15 | 0.0402   | 100         | 92.76 | 0.1655   |
| AD        | 67          | 35.10 |          | 135         | 60.54 |          |

Analysis of ADAM10 and ADAM17 mRNA level in cortical brain tissue

### Suppl. Table 1: Demographic data of donors and expression levels of ADAM10 and 17 in cortical tissue

A) Demographic data of donors as already presented in [32]. B) Relative expression levels of ADAM10 and ADAM17 from this previous publication.
